# Supplementary material for: A new bioremediation method for removal of wastewater containing oils with high oleic acid composition: Acinetobacter haemolyticus lipase immobilized on eggshell membrane with improved stabilities
Source: Royal Society of Chemistry journal article supplement (doi:10.1039/d0nj05175f), 2020-12-17
Supplement: d0nj05175f1.pdf [file d0nj05175f1.pdf]

**A new bioremediation method for removal of wastewater containing oils with high oleic acid composition: *Acinetobacter haemolyticus* lipase immobilized on eggshell membrane with improved stabilities**

**Ceyhun IŞIK<sup>a\*</sup>, Nurdan SARAÇ<sup>b</sup>, Mustafa TEKE<sup>a</sup>, Aysel UĞUR<sup>c</sup>**

<sup>a</sup> Muğla Sıtkı Koçman University, Faculty of Science, Chemistry Department, Muğla, Turkey

<sup>b</sup> Muğla Sıtkı Koçman University, Faculty of Science, Biology Department, Muğla, Turkey

<sup>c</sup> Gazi University, Faculty of Dentistry, Basic Sciences Department, Medical Microbiology

Section, Ankara, Turkey

**\*Corresponding author.**

Ceyhun Işık (Dr.) E-mail: cyhn87@yahoo.com

Tel: +90 252 211 15 02

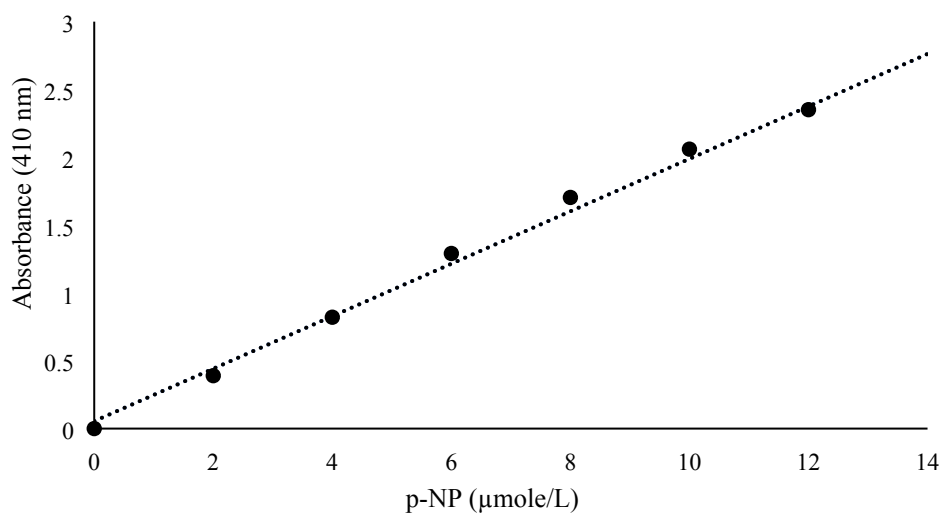

**Fig. S1** Standart curve of *p*-NP.

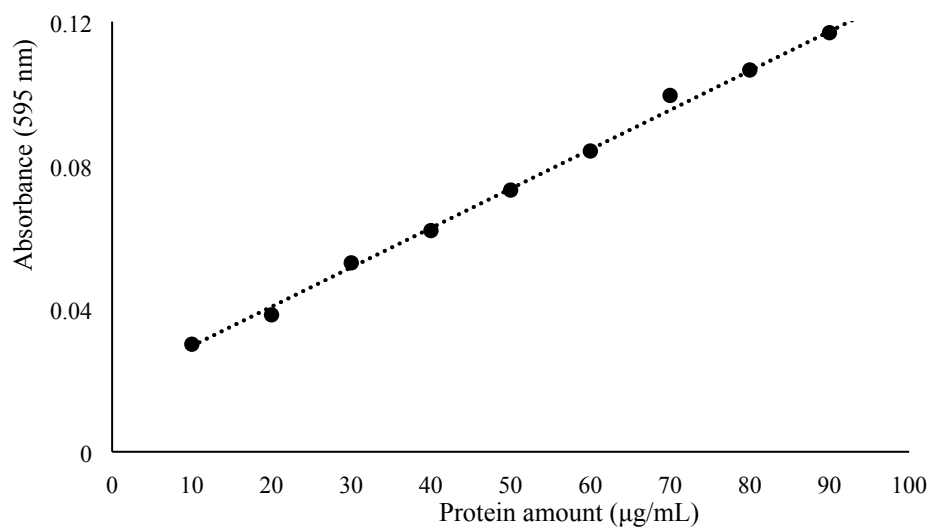

**Fig. S2** Standart curve of protein amount.

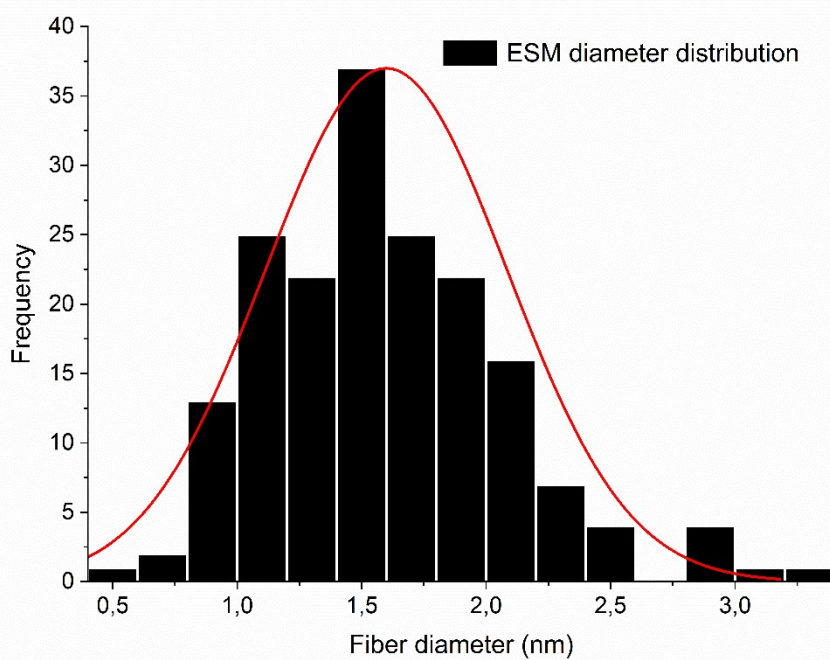

**Fig. S3** Size distribution of ESM.

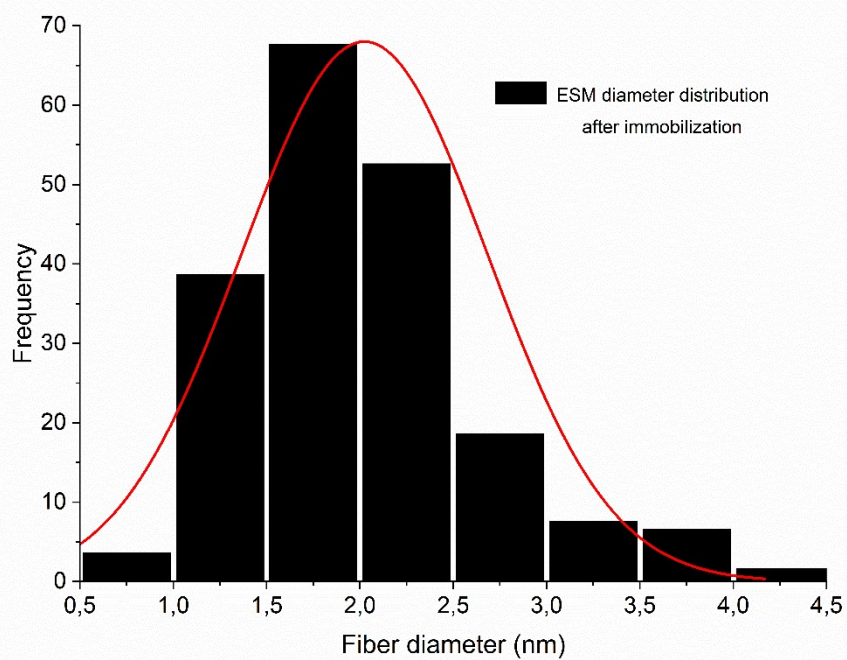

**Fig. S4** Size distribution of ESM after lipase immobilization.

**Table S1** Reusabilities comparison between similar studies.

| Carrier                                                        | Enzyme                             | Reuse Number | Reference            |
|----------------------------------------------------------------|------------------------------------|--------------|----------------------|
| ESM                                                            | <i>Burkholderia cepacia</i> lipase | 5            | 55                   |
| Oxidized ESM                                                   | <i>Burkholderia cepacia</i> lipase | 10           | 55                   |
| ESM                                                            | Pancreatic lipase                  | 15-16        | 57                   |
| ESM                                                            | <i>Burkholderia cepacia</i> lipase | 8            | 59                   |
| ESM                                                            | $\alpha$ -amylase                  | 10           | 56                   |
| Cu <sub>3</sub> (PO <sub>4</sub> ) <sub>2</sub><br>nanoflowers | <i>Pseudomonas cepacia</i> lipase  | 6            | 74                   |
| UiO-66/PVDF<br>membrane                                        | <i>Aspergillus oryzae</i> lipase   | 7            | 62                   |
| ESM                                                            | <i>A. haemolyticus</i> lipase      | 19           | <b>Present study</b> |

**Table S2** The fatty acid compositions of corn, olive, soybean and sunflower oil.<sup>72, 73</sup>

| Edible oils   | Palmitic<br>(16:0) | Stearic<br>(18:0) | Oleic<br>(18:1) | Linoleic<br>(18:2) | Linolenic<br>(18:3) |
|---------------|--------------------|-------------------|-----------------|--------------------|---------------------|
| Corn oil      | 10.6               | 2.0               | 26.7            | 59.8               | 0.9                 |
| Olive oil     | 14                 | 2                 | 64              | 16                 | 2                   |
| Soybean oil   | 6                  | 5.2               | 20.2            | 63.7               | 5                   |
| Sunflower oil | 6.1                | 5.3               | 21.4            | 66.4               | -                   |
